# Supplementary material
Source: publisher site journal article supplement (https://www.dovepress.com/article/386518)
Supplement: Supplementary file 1 [file get_supplementary_file.php]

**Suplementary Table 1.** International classification of Diseases 10th revision (ICD-10) used for the definition of comorbidities.

| Comorbidity | ICD-10 codes |
| --- | --- |
| Immunodeficiency with predominantly antibody defects | D80 |
| Combined immunodeficiencies | D81 |
| Immunodeficiency associated with other major defects | D82 |
| Common variable immunodeficiency | D83 |
| Other immunodeficiencies | D84 |
| Sarcoidosis | D86 |
| Other disorders involving the immune mechanism, not elsewhere classified | D89 |
| Inflammatory polyarthropathies | M05-14 |
| Other rheumatoid arthritis | M06 |
| Polyarteritis nodosa and related conditions | M30 |
| Other necrotising vasculopathies | M31 |
| Systemic lupus erythematosus (SLE) | M32 |
| Dermatopolymyositis | M33 |
| Systemic sclerosis [scleroderma] | M34 |
| Other systemic involvement of connective tissue | M35 |
| Systemic disorders of connective tissue in diseases classified elsewhere | M36 |
| Myositis | M60 |
| Myocardial infarction | I21-I24 |
| Atrial fibrillation | I48 |
| Heart failure | I110, I30, I32, I42, I50, J81 |
| Hypertension | I10-I15 |
| Peripheral vascular disease | I700, I702, I709, I739 I170-I174 I177 I79 |
| Cerebrovascular disease | I60-I64, G45, G46 |
| Diabetes Mellitus | E10-14 |
| Renal failure | I120, I131, I132; E102, E112, E132, E142  N02-N08, N11, N14, N158-N165, N168, N18, N19, N26 Z992 |
| Asthma | J45 |
| Bronchiectasis | J47 |
